# Supplementary material for: In situpreparation of programmable curli nanomaterials as fine-tuned sustainable supports enabling selective and oriented incorporation of enzymes
Source: Royal Society of Chemistry journal article supplement (doi:10.1039/d3cy00158j), 2023-01-01
Supplement: d3cy00158j1.pdf [file d3cy00158j1.pdf]

***In situ* preparation of programmable curli nanomaterials as fine-tuned sustainable supports enabling selective and oriented incorporation of enzymes**

Hao Dong <sup>1,2#</sup>, Wenxue Zhang <sup>1#</sup>, Chao Chen <sup>1\*</sup> & Ping Wang <sup>3\*</sup>

<sup>1</sup>*State Key Laboratory of Bioreactor Engineering, School of Biotechnology, East China University of Science and Technology, Shanghai 200237, China*

<sup>2</sup>*College of Food Science and Engineering, Ocean University of China, Qingdao 266003, China*

<sup>3</sup>*Department of Bioproducts and Biosystems Engineering, University of Minnesota, St Paul, MN 55108, USA*

\*Corresponding author: chaochen@ecust.edu.cn (C. Chen); ping@umn.edu (P. Wang)

# These authors contributed equally

## Supplementary figures and tables

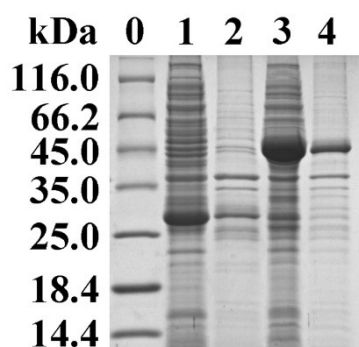

**Figure S1.** SDS-PAGE analysis of the expression of fluorescent proteins. Lane 0, protein marker; lane 1, the supernatant of the cell lysis of induced IN01; lane 2, the precipitation of the cell lysis of induced IN01; lane 3, the supernatant of the cell lysis of induced IN02; lane 4, the precipitation of the cell lysis of induced IN02.

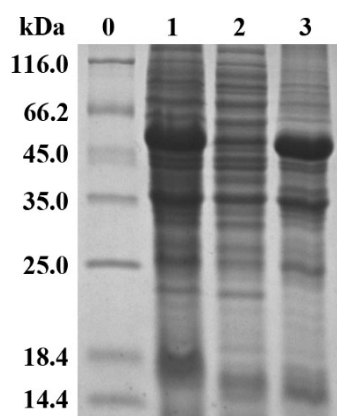

**Figure S2.** SDS-PAGE analysis of the expression of Est3-14(SpyCatcher). Lane 0, protein marker; lane 1, the cell lysis of induced EX02; lane 2, the supernatant of the cell lysis of induced EX02; lane 3, the precipitation of the cell lysis of induced EX02.

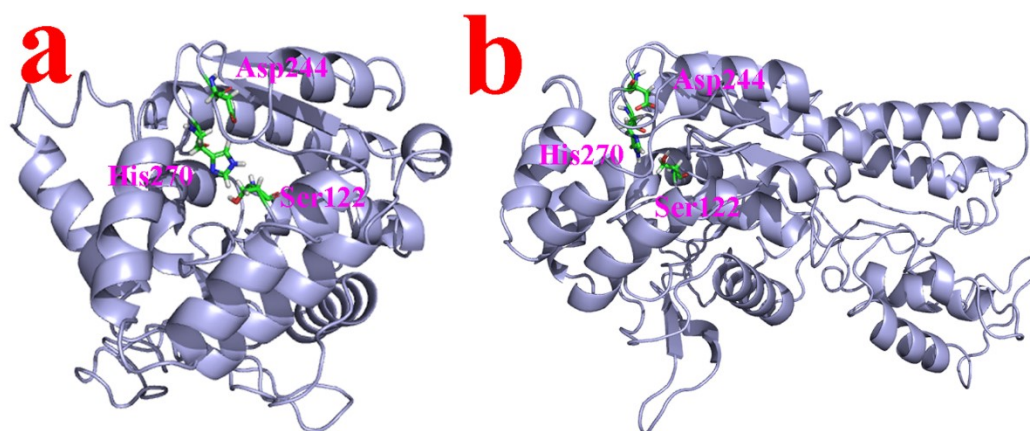

**Figure S3.** 3D structures and the catalytic triad of Est3-14 (a) and Est3-14(SpyCatcher) (b).

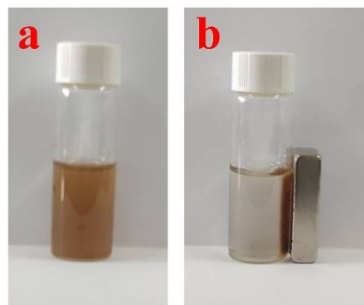

**Figure S4.** Before (a) and after (b) recovery of immobilized esterases using a magnet.

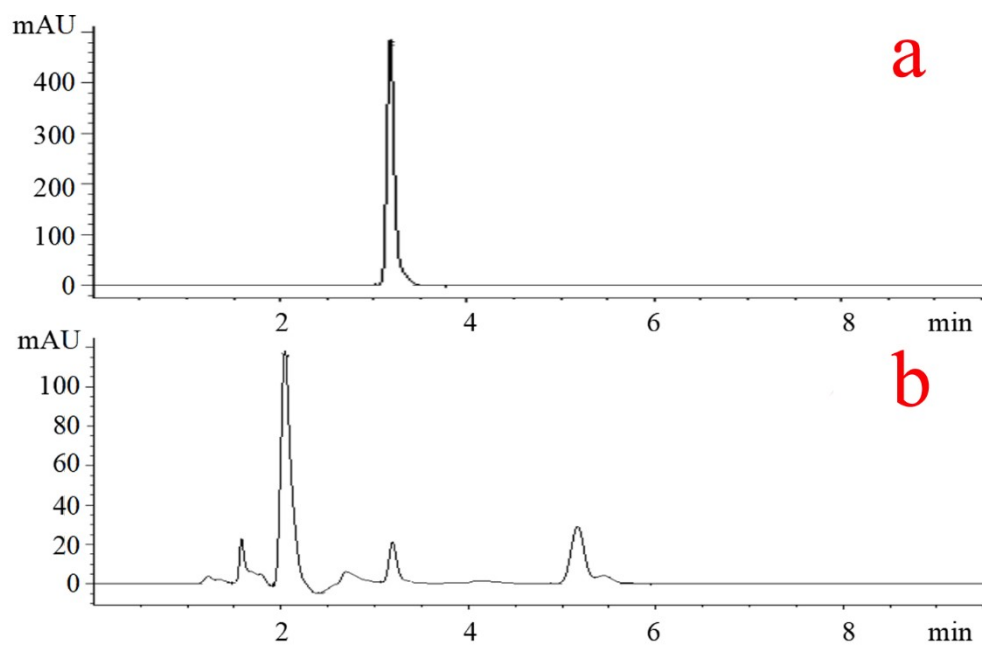

**Figure S5.** HPLC results of dibutyl phthalate before (a) and after (b) enzymatic hydrolysis.

## Supplementary tables

**Table S1** Amino acid sequences of functional proteins

| Name                               | Amino acids sequence                                                                                                                                                                                                                                                                                                                                                                                                                                                                                                  | Length (aa) |
|------------------------------------|-----------------------------------------------------------------------------------------------------------------------------------------------------------------------------------------------------------------------------------------------------------------------------------------------------------------------------------------------------------------------------------------------------------------------------------------------------------------------------------------------------------------------|-------------|
| CsgA(SpyTag) <sup>1</sup>          | MKLLKVAIAAIVFSGSALAGVVPQYGGGGNHGGGG<br>NNSGPNSELNIYQYGGGNSALALQTDARNSDLTITQH<br>GGGNGADVGGSDSSIDLTRGFGNSATLDQWNG<br>KNSEMTVKQFGGGNGAAVDQTASNSSVNVTVQVGF<br>NNATAHQYGGGGSSGGGSAHIVMVDAYKPTK                                                                                                                                                                                                                                                                                                                            | 174         |
| CsgB <sup>2</sup>                  | MAGYDLANSEYNFAVNELSKSSFNQAAIIGQAGTNS<br>AQLRQGGSKLLAVVAQEGSSNRAKIDQTGDYNLAYI<br>DQAGSANDASISQGAYGNTAMIIQKGSNGKANITQYG<br>TQKTAIVVQRQSQMAIRVTQRHHHHHHH                                                                                                                                                                                                                                                                                                                                                                 | 137         |
| GFP <sup>3</sup>                   | MGHHHHHHMVSKGEEDNMASLPATHELHIFGSINGV<br>DFDMVGQGTGNPNDGYEELNLKSTKGDLQFSPWILV<br>PHIGYGFHQYLPYDPGMSPFQAAMVDGSGYQVHRT<br>MQFEDGASLTVNYRYTYEGSHIKGEAQVKGTGFPAD<br>GPVMTNSLTAADWCRSKKTYPNDKTIISTFKWSYTTG<br>NGKRYRSTARTTYTFAKPMAANYLKNQPMYVFRKT<br>ELKHSKTELNFKEWQKAFTDVMGMDELKLAALAE<br>EEEEAYGWMDF                                                                                                                                                                                                                      | 261         |
| SpyCatcher <sup>4</sup>            | MSYYHHHHHHHDYDIPTTENLYFQGAMVDTL SGLSSE<br>QGQSGDMTIEEDSATHIKFSKRDEDGKELAGATMELR<br>DSSGKTISTWISDGQVKDFLYPGKYTFVETAAPDGY<br>EVATAITFTVNEQGQVTVNGKATKGDAHI                                                                                                                                                                                                                                                                                                                                                              | 139         |
| Est3-14(SpyCatcher) <sup>4,5</sup> | MGHHHHHHSVKPTSVM DIPLLPGR LISLPGRGEIFVR<br>HHQHVNPDAPTLLLLHGWTASSDLQFFTAYEELSRN<br>YSIVGVDHRGHGRGLRPNHTFSLEDCADDAAAVVRA<br>LGIRNVITVGYSMGGPISLLVWQRHSDLVTGMVLQAT<br>ALEWSGTRQERNKWRVMHVIDPLFRRINSPRLTRWY<br>VRLIPRGHEINRYLPWITGELRRNDSWMISEAGRAIS<br>RFDARGFAHTVNVPTSFVLTTLDKLVLP HKQQALAD<br>AVRAEVVELEGDHLAPMQQPREFSWATARAVEIVVR<br>QTNQKLG GGGSSGGGSSMSYYHHHHHHHDYDIPTTENL<br>YFQGAMVDTL SGLSSEQGQSGDMTIEEDSATHIKFSK<br>RDEDGKELAGATMELRDSSGKTISTWISDGQVKDFYL<br>YPGKYTFVETAAPDGYEVATAITFTVNEQGQVTVNG<br>KATKGDAHI | 448         |

**Table S2** Strains and plasmids used in this study

| Strains      | Description        | Source                   |
|--------------|--------------------|--------------------------|
| DH5 $\alpha$ | Cloning            | Stored in our laboratory |
| BL21(DE3)    | Protein expression | Stored in our            |

|                                            |                                                          |                                               |
|--------------------------------------------|----------------------------------------------------------|-----------------------------------------------|
|                                            |                                                          | laboratory                                    |
| BL21:: $\Delta$ CsgA                       | Protein expression; with chloramphenicol resistance gene | Constructed in our previous work <sup>1</sup> |
|                                            |                                                          |                                               |
| <b>Plasmids</b>                            | <b>Description</b>                                       | <b>Source</b>                                 |
| pET21a (+)                                 | Ampicillin; pBR322 origin                                | Stored in our laboratory                      |
| pET28a (+)                                 | Kanamycin; pBR322 origin                                 | Stored in our laboratory                      |
|                                            |                                                          |                                               |
| <b>Recombinant strains (Abbreviations)</b> | <b>Description</b>                                       | <b>Source</b>                                 |
| <b>EX01</b><br>(Amp)                       | BL21(DE3)<br>pET21a- <i>CsgB</i>                         | This work                                     |
| <b>EX02</b><br>(Kan)                       | BL21(DE3)<br>pET28a- <i>Est3-14(SpyCatcher)</i>          | This work                                     |
| <b>EX03</b><br>(Amp+Chl)                   | BL21:: $\Delta$ CsgA<br>pET21a- <i>CsgA(SpyTag)</i>      | Previous work <sup>1</sup>                    |
| <b>EX04</b><br>(Kan)                       | BL21(DE3)<br>pET28a- <i>Est3-14</i>                      | This work                                     |
| <b>IN01</b><br>(Kan)                       | BL21(DE3)<br>pET28a- <i>GFP</i>                          | Previous work <sup>6</sup>                    |
| <b>IN02</b><br>(Kan)                       | BL21(DE3)<br>pET28a- <i>GFP-SpyCatcher</i>               | Previous work <sup>6</sup>                    |

## References

- 1 H. Dong, W. Zhang, Q. Xuan, Y. Zhou, S. Zhou, J. Huang and P. Wang, *ACS Appl. Mater. Interfaces*, 2021, 13, 6168-6179.
- 2 N. M. Dorval Courchesne, A. Duraj-Thatte, P. K. R. Tay, P. Q. Nguyen and N. S. Joshi, *ACS Biomater. Sci. Eng.*, 2017, 3, 733-741.
- 3 M. Zimmer, *Chem. Rev.*, 2002, 102, 759-781.
- 4 M. G. Nussbaumer, P. Q. Nguyen, P. K. R. Tay, A. Naydich, E. Hysi, Z. Botyanszki and N. S. Joshi, *ChemCatChem*, 2017, 9, 4328-4333.
- 5 P. Lu, X. Gao, H. Dong, Z. Liu, F. Secundo, C. Xue and X. Mao, *J. Agric. Food Chem.*, 2018, 66, 2812-2821.
- 6 H. Dong, W. Zhang, S. Zhou, H. Ying and p. wang, *ChemSusChem*, 2022 e202200850.
